# Supplementary material
Source: Springer Nature journal article supplement (https://www.springermedizin.de/resource/supplementary/12874_2012_893_MOESM3_ESM.pdf/9433024)

**A: Incremental cost-effectiveness planewith results for 55-year-old patients**

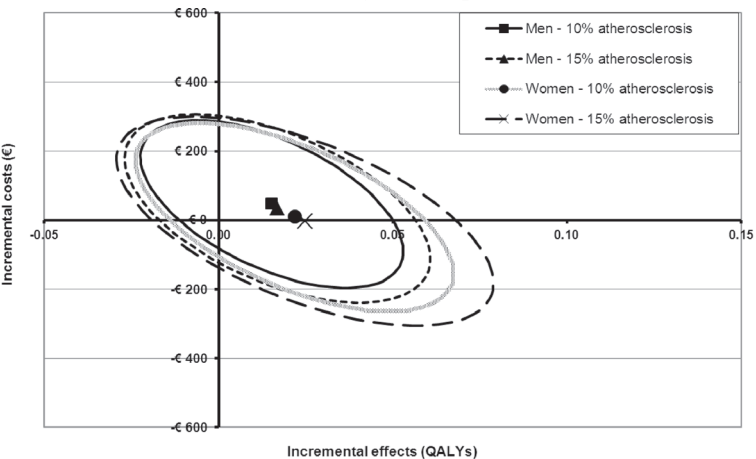

**B: Incremental cost-effectiveness plane with results for 65-year-old patients**

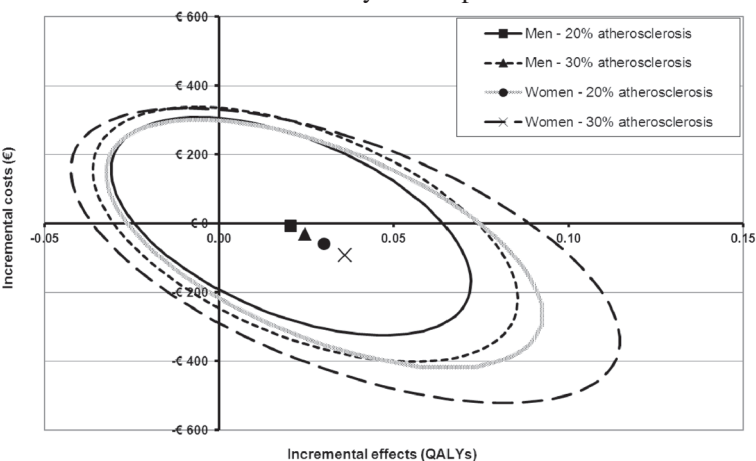

**C: Incremental cost-effectiveness plane with results for 75-year-old patients**

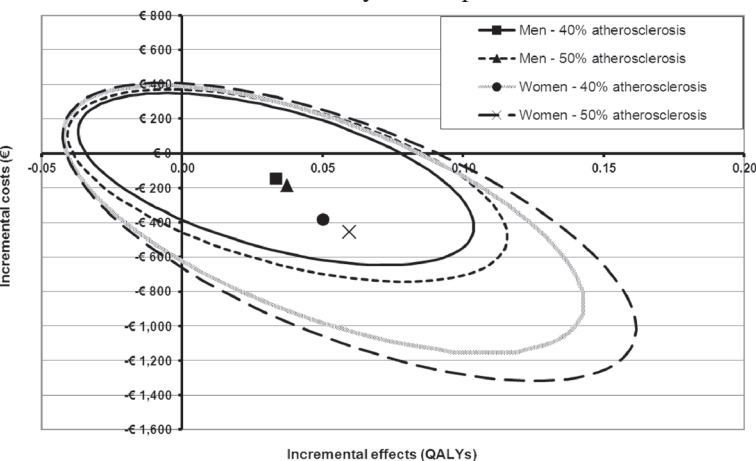

Supplement: MOESM3 [file 9433024]
